# Supplementary material
Source: PubMed Central journal article supplement (PMC2855136)
Supplement: NIHMS92103-supplement-supplement_1.pdf [file NIHMS92103-supplement-supplement_1.pdf]

# Identification of Rotavirus VP6-Specific CD4<sup>+</sup> T Cell Epitopes in a G1P[8] Human Rotavirus-Infected Rhesus Macaque

Wei Zhao, Bapi Pahar and Karol Sestak

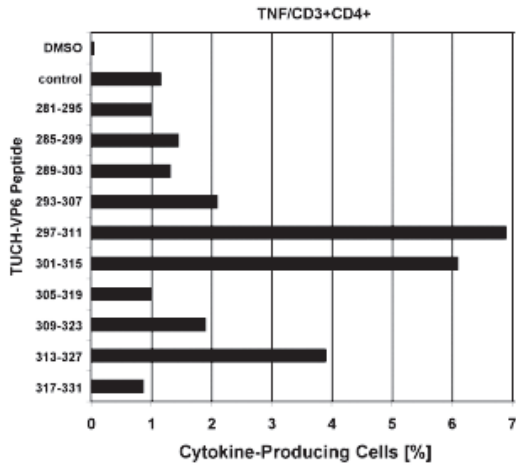

**Supplement Figure 1.** TNF production by CD4<sup>+</sup> T cells. Individual peptides from the VP6<sub>281-331</sub> pool were used to stimulate peripheral blood cells collected from GA02 macaque at PCD 14 for their ability to produce TNF. The increased production was associated with the VP6<sub>297-315</sub> and VP6<sub>313-327</sub> regions.
